# Supplementary material for: EphB6 Regulates TFEB-Lysosomal Pathway and Survival of Disseminated Indolent Breast Cancer Cells
Source: PubMed Central journal article supplement (PMC7959459; doi:10.3390/cancers13051079), 2021-03-03

**Figure S1:** Full list of gene sets of the balloon plot presented in Figure 3A.

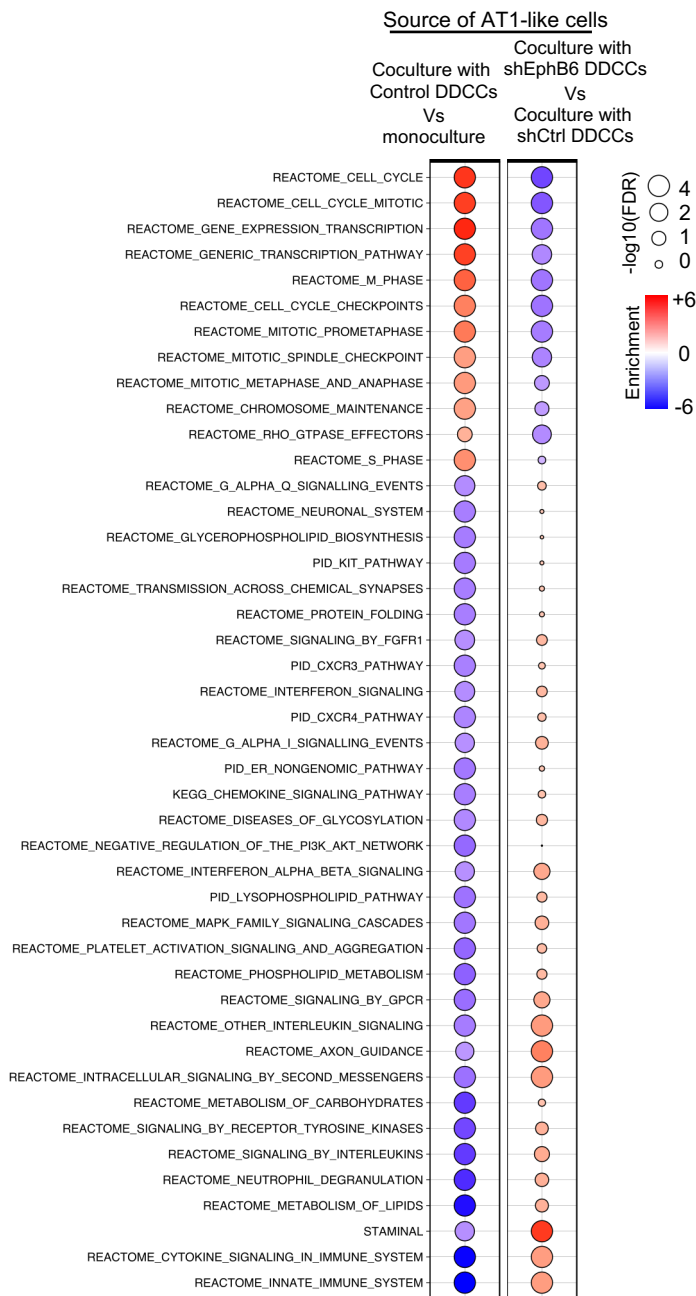

**Figure S2:** Full list of gene sets of the balloon plot presented in Figure 4B.

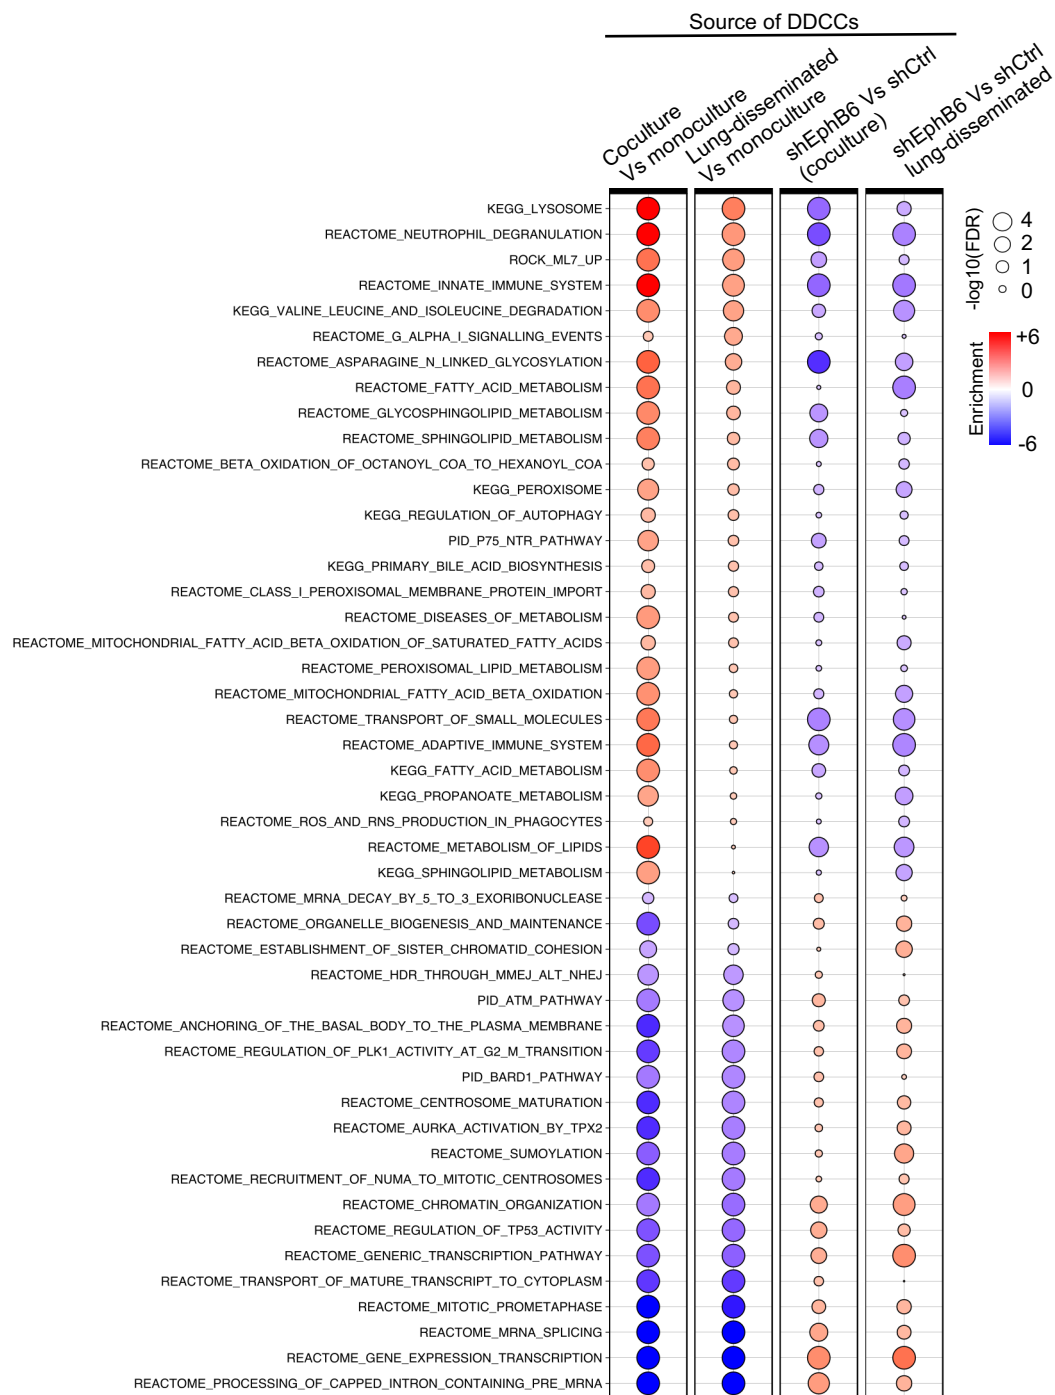

**Figure S3. (A)** qPCR analysis of *Ephb6* mRNA in MCF7-EGFP cells stably expressing shRNA. One-way ANOVA test. Mean with SD. **(B)** Percentage of the cytoplasm with positive LysoTracker signal in MCF7-EGFP cells with indicated shRNAs upon coculture with AT1-like cells. n=3 independent experiments. Kruskal Wallis multiple comparisons test. **(C)** Relative human *TFEB* mRNA in shControl- and shEphB6#31-D2.0R-EGFP cells stably expressing the indicated TFEB isoforms. n=2 independent experiments. One-way ANOVA test. **(D)** Akt activity in shControl- or shEphB6-cells upon coculture with AT1-like cells as assayed by the Akt biosensor. n=3 independent experiments. Kruskal-Wallis test.

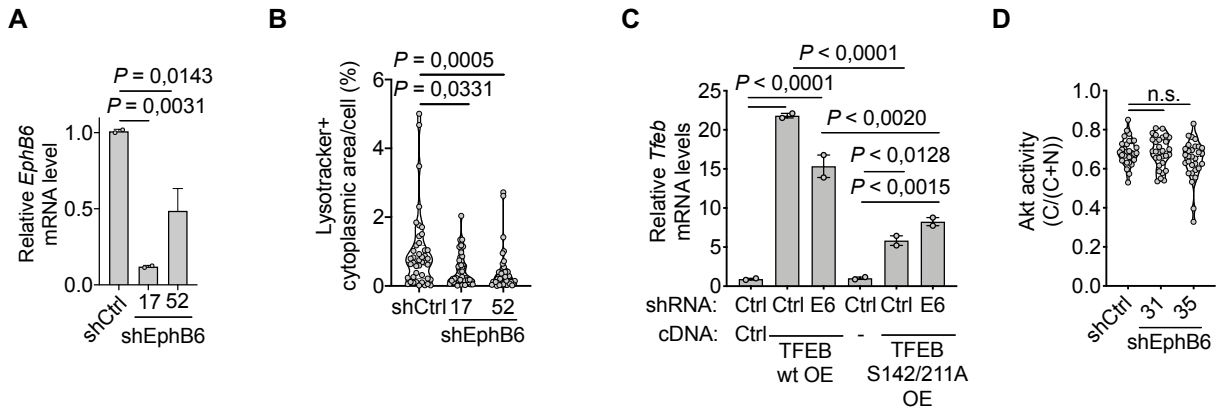

Supplement: cancers-13-01079-s001.pdf [file cancers-13-01079-s001.pdf]
